# Supplementary material for: Influence of tungsten on the NH3-SCR activity of MnWOx/TiO2 catalysts
Source: Royal Society of Chemistry journal article supplement (doi:10.1039/c7ra00427c), 2017-01-01
Supplement: c7ra00427c1.pdf [file c7ra00427c1.pdf]

### **Influence of tungsten on the NH<sub>3</sub>-SCR activity of MnO<sub>2</sub> based catalysts**

*Lu peng, Li Huan, Liu Huayan, Chen Yinfei, Zhang zekai\**

*Department of Energy Chemical Engineering, Zhejiang University of Technology,*

*Chaowang Road 18, Hangzhou, 310014, China*

*E-mail of corresponding author: zzk@zjut.edu.cn*

Table S1 The main peak's positions of characterization of Mn<sub>a</sub>WO<sub>x</sub>/TiO<sub>2</sub> systems by H<sub>2</sub>-TPR method

| samples                                                | P1  | P2  | P3  | P4  | P5  | P6  | P7  | P8 |
|--------------------------------------------------------|-----|-----|-----|-----|-----|-----|-----|----|
| MnO <sub>2</sub> /TiO <sub>2</sub> -SHS                | 230 | 300 | 390 | 460 |     |     |     |    |
| Mn <sub>5</sub> WO <sub>x</sub> /TiO <sub>2</sub> -SHS | 220 | 260 | 330 | 430 | -   | -   | 730 |    |
| Mn <sub>2</sub> WO <sub>x</sub> /TiO <sub>2</sub> -SHS | 220 | 260 | 330 | 430 | -   | -   | 750 |    |
| MnWO <sub>x</sub> /TiO <sub>2</sub> -SHS               | -   | -   | -   | -   | -   | -   | 800 |    |
| WO <sub>3</sub> /TiO <sub>2</sub> -SHS                 | -   | -   | -   | -   | 520 | 650 | 820 |    |

Table S2 Quantitative analysis data of H<sub>2</sub>-TPR profiles

| Catalysts                                              | H <sub>2</sub> - consumption(mmol/g) |       |       |       |       |       |       | Sum   |
|--------------------------------------------------------|--------------------------------------|-------|-------|-------|-------|-------|-------|-------|
|                                                        | Peak1                                | Peak2 | Peak3 | Peak4 | Peak5 | Peak6 | Peak7 |       |
| WO <sub>3</sub> /TiO <sub>2</sub> -SHS                 | -                                    | -     | -     | -     | 0.68  | 0.62  | 0.53  | 1.83  |
| MnO <sub>x</sub> /TiO <sub>2</sub> -SHS                | 0.017                                | 0.026 | 0.080 | 0.009 | -     | -     | -     | 0.132 |
| MnWO <sub>x</sub> /TiO <sub>2</sub> -SHS               | -                                    | -     | -     | -     | -     | -     | 0.88  | 0.88  |
| Mn <sub>2</sub> WO <sub>x</sub> /TiO <sub>2</sub> -SHS | 0.22                                 | 0.13  | 0.12  | 0.19  | -     | -     | 0.58  | 1.24  |
| Mn <sub>5</sub> WO <sub>x</sub> /TiO <sub>2</sub> -SHS | 0.16                                 | 0.094 | 0.066 | 0.17  | -     | -     | 0.28  | 0.77  |

Table S3 elements distribution via EDX/TEM

| Samples                                                | Elements/(Atomic%) |       |       |       | Mn:W ratio |
|--------------------------------------------------------|--------------------|-------|-------|-------|------------|
|                                                        | O(K)               | Mn(K) | W(L)  | Ti(K) |            |
| Mn <sub>2</sub> WO <sub>x</sub> -SHS                   | 71.84              | 16.89 | 11.25 | -     | 1.5        |
| Mn <sub>2</sub> WO <sub>x</sub> /TiO <sub>2</sub> -SHS | 66.72              | 1.80  | 2.35  | 29.10 | 0.8        |
| Mn <sub>2</sub> WO <sub>x</sub> -CP                    | 75.45              | 9.48  | 15.06 | -     | 0.6        |
| Mn <sub>2</sub> WO <sub>x</sub> /TiO <sub>2</sub> -IMP | 73.79              | 7.42  | 6.95  | 11.81 | 1.1        |

Table S4 elements distribution via EDS/SEM

| Samples                                                | Elements/(Atomic%) |       |       |       | Mn:W  |
|--------------------------------------------------------|--------------------|-------|-------|-------|-------|
|                                                        | O(K)               | Mn(K) | W(L)  | Ti(K) | ratio |
| MnWO <sub>x</sub> -SHS                                 | 59.93              | 20.08 | 19.99 | -     | 1.00  |
| Mn <sub>2</sub> WO <sub>x</sub> -SHS                   | 57.72              | 27.93 | 14.36 | -     | 1.94  |
| Mn <sub>2</sub> WO <sub>x</sub> -CP                    | 59.27              | 20.79 | 19.94 | -     | 1.04  |
| Mn <sub>2</sub> WO <sub>x</sub> /TiO <sub>2</sub> -SHS | 58.35              | 4.61  | 1.85  | 35.19 | 2.49  |

TableS5. Bulk Mn<sub>a</sub>WO<sub>x</sub> catalysts via self-propagating high-temperature synthesis(SHS)

| samples                               | molar ratio of Mn to W | metal salt precursor                                                                                                                                          | The amount of glycine (10times amount of metal-salts ) |
|---------------------------------------|------------------------|---------------------------------------------------------------------------------------------------------------------------------------------------------------|--------------------------------------------------------|
| MnO <sub>2</sub> -SHS                 | -                      | 0.01molMn(NO <sub>3</sub> ) <sub>2</sub> ·4H <sub>2</sub> O                                                                                                   | 0.1mol                                                 |
| WO <sub>3</sub> -SHS                  | -                      | 0.001mol(NH <sub>4</sub> ) <sub>10</sub> W <sub>12</sub> O <sub>41</sub> ·xH <sub>2</sub> O                                                                   | 0.01mol                                                |
| MnWO <sub>x</sub> -SHS                | 1:1                    | 0.006molMn(NO <sub>3</sub> ) <sub>2</sub> ·4H <sub>2</sub> O<br>+0.0005mol(NH <sub>4</sub> ) <sub>10</sub> W <sub>12</sub> O <sub>41</sub> ·xH <sub>2</sub> O | 0.065mol                                               |
| Mn <sub>2</sub> WO <sub>x</sub> -SHS  | 2:1                    | 0.012molMn(NO <sub>3</sub> ) <sub>2</sub> ·4H <sub>2</sub> O<br>+0.0005mol(NH <sub>4</sub> ) <sub>10</sub> W <sub>12</sub> O <sub>41</sub> ·xH <sub>2</sub> O | 0.125mol                                               |
| Mn <sub>5</sub> WO <sub>x</sub> -SHS  | 5:1                    | 0.012molMn(NO <sub>3</sub> ) <sub>2</sub> ·4H <sub>2</sub> O<br>+0.0002mol(NH <sub>4</sub> ) <sub>10</sub> W <sub>12</sub> O <sub>41</sub> ·xH <sub>2</sub> O | 0.122mol                                               |
| Mn <sub>10</sub> WO <sub>x</sub> -SHS | 10:1                   | 0.012molMn(NO <sub>3</sub> ) <sub>2</sub> ·4H <sub>2</sub> O<br>+0.0001mol(NH <sub>4</sub> ) <sub>10</sub> W <sub>12</sub> O <sub>41</sub> ·xH <sub>2</sub> O | 0.121mol                                               |

TableS6. The supported  $Mn_aWO_x/TiO_2$  catalysts via self-propagating high-temperature synthesis(SHS), The loading amount of active components is kept at 20wt%.

| samples                  | molar ratio of Mn to W | The amount of metal salt precursor                                                                          | The amount of glycine(three times of the total amount of metal-salts and $TiO_2$ ) |
|--------------------------|------------------------|-------------------------------------------------------------------------------------------------------------|------------------------------------------------------------------------------------|
| $MnO_2/TiO_2$ -SHS       | -                      | 0.00431mol $Mn(NO_3)_2 \cdot 4H_2O + 1.5gTiO_2$                                                             | 0.0692mol                                                                          |
| $WO_3/TiO_2$ -SHS        | -                      | 0.000131mol $(NH_4)_{10}W_{12}O_{41} \cdot xH_2O + 1.5gTiO_2$                                               | 0.0567mol                                                                          |
| $MnWO_x/TiO_2$ -SHS      | 1:1                    | 0.00157mol $Mn(NO_3)_2 \cdot 4H_2O + 0.000131mol(NH_4)_{10}W_{12}O_{41} \cdot xH_2O + 1.5gTiO_2$            | 0.0613mol                                                                          |
| $Mn_2WO_x/TiO_2$ -SHS    | 2:1                    | 0.00256mol $Mn(NO_3)_2 \cdot 4H_2O + 0.000107mol(NH_4)_{10}W_{12}O_{41} \cdot xH_2O + 1.5gTiO_2$            | 0.0643mol                                                                          |
| $Mn_5WO_x/TiO_2$ -SHS    | 5:1                    | 0.00408mol $Mn(NO_3)_2 \cdot 4H_2O + 0.68 \cdot 10^{-5}mol(NH_4)_{10}W_{12}O_{41} \cdot xH_2O + 1.5gTiO_2$  | 0.0685mol                                                                          |
| $Mn_{10}WO_x/TiO_2$ -SHS | 10:1                   | 0.00511mol $Mn(NO_3)_2 \cdot 4H_2O + 0.426 \cdot 10^{-5}mol(NH_4)_{10}W_{12}O_{41} \cdot xH_2O + 1.5gTiO_2$ | 0.0716mol                                                                          |

|  |  |                         |  |
|--|--|-------------------------|--|
|  |  | O+1.5 gTiO <sub>2</sub> |  |
|--|--|-------------------------|--|

TableS7. The supported MnWO<sub>x</sub>/TiO<sub>2</sub> catalysts via impregnation method (the loading amount of active components is kept at 20wt%)

| samples                                                | molar ratio of Mn to W | metal salt precursor                                                                                                                                                             |
|--------------------------------------------------------|------------------------|----------------------------------------------------------------------------------------------------------------------------------------------------------------------------------|
| MnWO <sub>x</sub> /TiO <sub>2</sub> -IMP               | 1:1                    | 0.00209molMn(NO <sub>3</sub> ) <sub>2</sub> ·4H <sub>2</sub> O+0.000174mol(NH <sub>4</sub> ) <sub>10</sub> W <sub>12</sub> O <sub>41</sub> ·xH <sub>2</sub> O+2gTiO <sub>2</sub> |
| Mn <sub>2</sub> WO <sub>3</sub> /TiO <sub>2</sub> -IMP | 2:1                    | 0.0034molMn(NO <sub>3</sub> ) <sub>2</sub> ·4H <sub>2</sub> O+0.000142mol(NH <sub>4</sub> ) <sub>10</sub> W <sub>12</sub> O <sub>41</sub> ·xH <sub>2</sub> O+2gTiO <sub>2</sub>  |

TableS8. The MnWO<sub>x</sub> catalysts via Co-precipitation synthesis

method

| samples                             | molar ratio of Mn to W | metal salt precursor                                                                                  |
|-------------------------------------|------------------------|-------------------------------------------------------------------------------------------------------|
| MnWO <sub>x</sub> -CP               | 1:1                    | 0.01molMnCl <sub>2</sub> ·4H <sub>2</sub> O+0.01molNa <sub>2</sub> WO <sub>4</sub> ·2H <sub>2</sub> O |
| Mn <sub>2</sub> WO <sub>x</sub> -CP | 2:1                    | 0.02molMnCl <sub>2</sub> ·4H <sub>2</sub> O+0.01molNa <sub>2</sub> WO <sub>4</sub> ·2H <sub>2</sub> O |

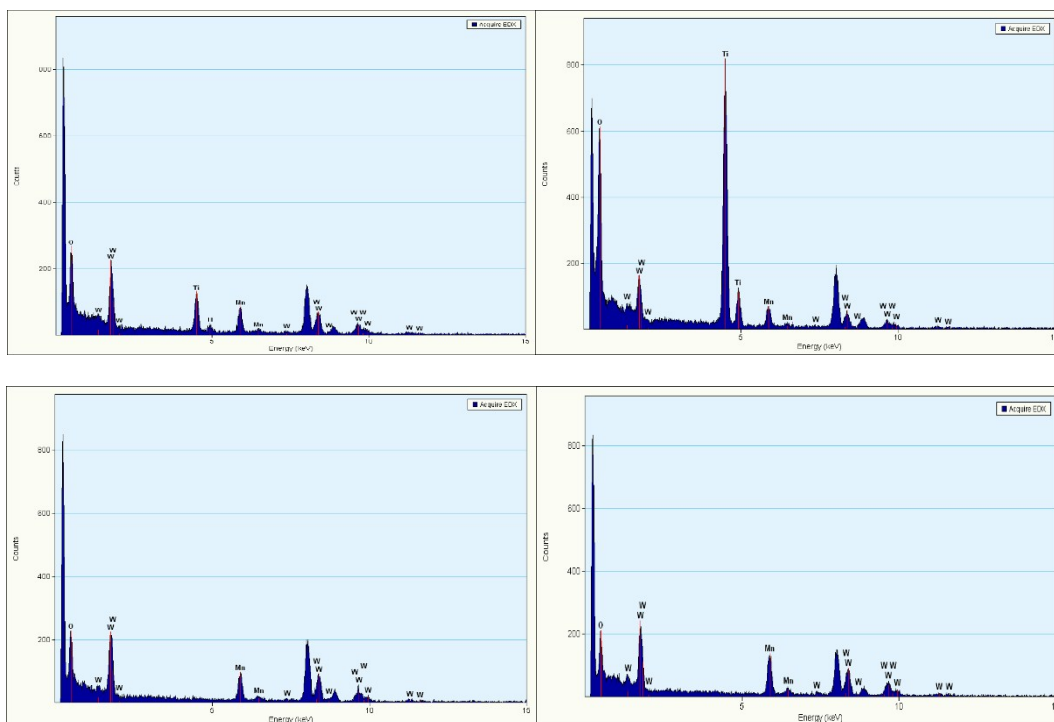

Fig.S1 EDX patterns of the bulk and supported  $Mn_aWO_x$  catalysts with different preparation methods

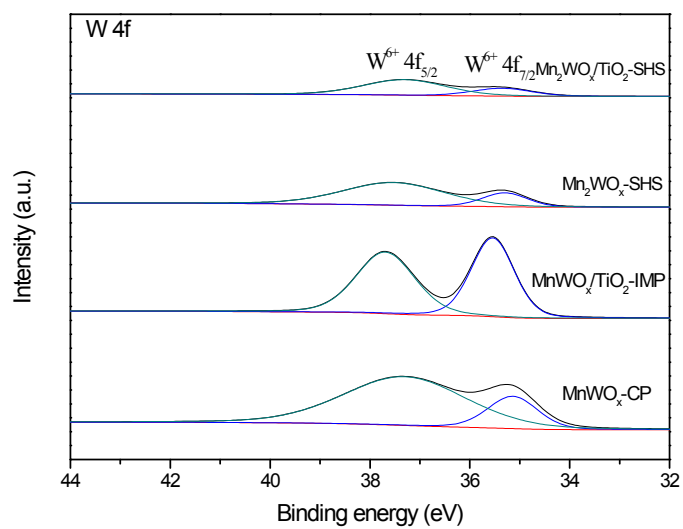

Fig.S2 W4f XPS spectra of  $MnWO_x$ -CP,  $MnWO_x/TiO_2$ -IMP,  $Mn_2WO_x$ -SHS and  $Mn_2WO_x/TiO_2$ -SHS

The resistance to  $\text{SO}_2$  and  $\text{H}_2\text{O}$  is an important property besides the activity for catalysts. The  $\text{H}_2\text{O}$  and  $\text{SO}_2$  in exhaust fumes can induce the deactivation and poisoning of catalyst. Therefore, the influence of  $\text{H}_2\text{O}$  and  $\text{SO}_2$  on NO conversion by  $\text{Mn}_2\text{WO}_x/\text{TiO}_2\text{-SHS}$  at 200 °C and 260 °C was investigated. 10 vol%  $\text{H}_2\text{O}$  was added to the system, the  $\text{NO}_x$  conversion of  $\text{Mn}_2\text{WO}_x/\text{TiO}_2\text{-SHS}$  showed a notable deactivation on NO reduction at 200 °C. However, NO conversion slightly decreased from 99% to 98% at 260 °C. After 3.5h(200 °C) or 8h(260 °C), when  $\text{H}_2\text{O}$  was removed from the flue gas, NO conversion nearly recovered to original levels. This result indicated that the decrease in activity brought about by  $\text{H}_2\text{O}$  might be caused by its competitive adsorption between with  $\text{NH}_3$  and  $\text{NO}_x$  on the active sites over the catalyst surface.

In the presence of 100ppm  $\text{SO}_2$  at 200 °C and 260 °C, the NO conversion of  $\text{Mn}_2\text{WO}_x/\text{TiO}_2\text{-SHS}$  decreased from the initial 100% to 72% in 3.5 h and 100% to 80% in 8h respectively. After the removal of  $\text{SO}_2$ , NO conversion over  $\text{Mn}_2\text{WO}_x/\text{TiO}_2\text{-SHS}$  partly recovered to 80% and 85%. The coexistence of 100 ppm  $\text{SO}_2$  and 5 vol.%  $\text{H}_2\text{O}$  notably induced decrease of NO conversion at both 200 °C and 260 °C. After switching off  $\text{SO}_2$  and  $\text{H}_2\text{O}$ , the NO conversion was recovered with a sharp increase from 65% to 70% and 70% to 80%. It can be speculated that some ammonium sulfates or ammonium bisulfate may be formed by the reaction between  $\text{SO}_2$  and the reactants ( $\text{NH}_3$ ,  $\text{H}_2\text{O}$  and  $\text{O}_2$ ) and the formed sulfates can occupy the active sites or deposit on the surface of the catalyst.

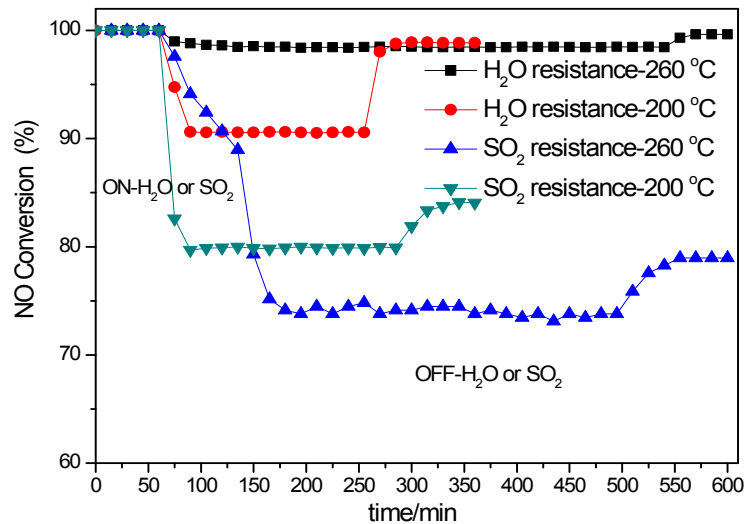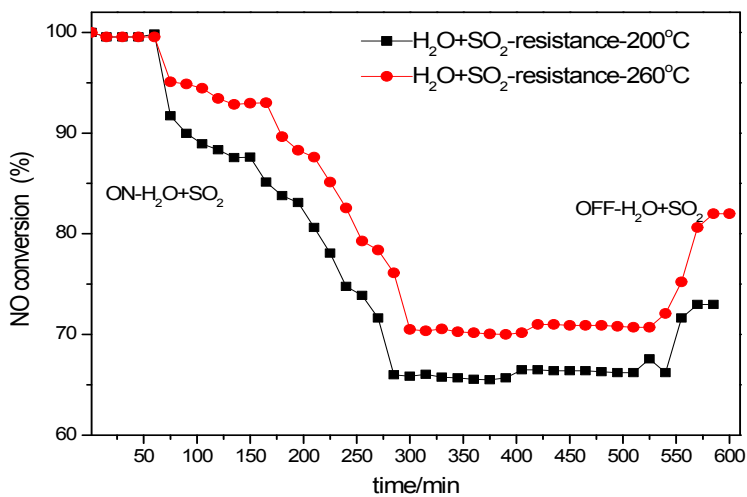

Fig.S3 The H<sub>2</sub>O and SO<sub>2</sub> resistance of Mn<sub>2</sub>WO<sub>x</sub>/TiO<sub>2</sub>-SHS

Reaction conditions: H<sub>2</sub>O=10% or SO<sub>2</sub>=100ppm, GHSV=30000h<sup>-1</sup>

In order to investigate the effects of W species in Mn<sub>a</sub>WO<sub>x</sub>/TiO<sub>2</sub> catalyst, the separate NH<sub>3</sub> oxidation (NH<sub>3</sub> + O<sub>2</sub>) experiments were also carried out (Fig.S4). The NH<sub>3</sub> oxidation ability may directly affect NH<sub>3</sub>-SCR activity in the high temperature range. The NH<sub>3</sub> oxidation ability of MnWO<sub>x</sub>/TiO<sub>2</sub> is obviously lower than that of



$\text{MnO}_x/\text{TiO}_2$ , increasing the ratio of Mn/W results in the increase of the  $\text{NH}_3$  oxidation ability, which means that a suitable addition of W could inhibit the unselective oxidation of  $\text{NH}_3$  and thus promote the high temperature activity. Considering the XRD pattern and SCR activity, the  $\text{MnWO}_x/\text{TiO}_2$  only presents the characteristic peaks of  $\text{MnWO}_4$  and  $\text{TiO}_2$ , but the  $\text{MnWO}_4$  and  $\text{Mn}_3\text{O}_4$  disappears together on the patterns of  $\text{Mn}_2\text{WO}_x/\text{TiO}_2$  and  $\text{Mn}_5\text{WO}_x/\text{TiO}_2$ . The results suggest that the existence of  $\text{MnWO}_4$  crystalline phase may be beneficial to the enhancement of  $\text{N}_2$  selectivity in  $\text{NH}_3$ -SCR reaction. When the ratio of Mn/W exceed 1, amorphous  $\text{Mn}_3\text{O}_4$  destroy the existence of  $\text{MnWO}_4$  crystalline phase, resulting in weaker  $\text{NH}_3$  adsorption and higher  $\text{NH}_3$  unselective oxidation.

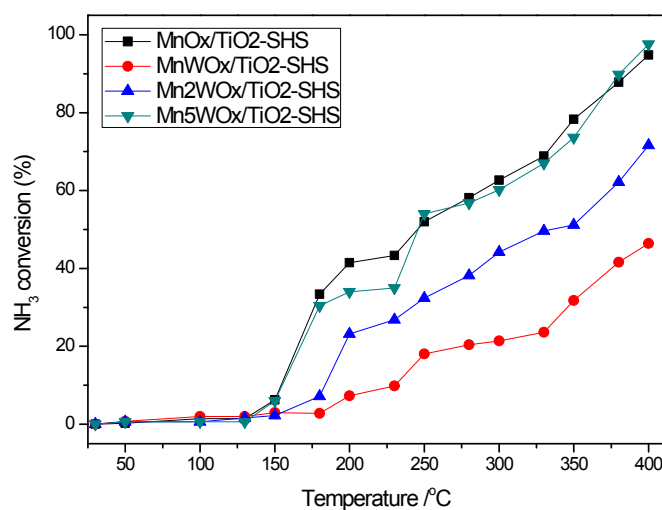

Fig.S4  $\text{NH}_3$  conversions during separate  $\text{NH}_3$  oxidation reaction over  $\text{MnO}_x/\text{TiO}_2$  and  $\text{Mn}_a\text{WO}_x/\text{TiO}_2$  catalysts. Reaction conditions:  $[\text{NO}] = [\text{NH}_3] = 500$  ppm,  $[\text{O}_2] = 5$  vol.%,  $\text{N}_2$  balance and GHSV  $30,000 \text{ h}^{-1}$ .

The  $\text{NO}_2$  production in the separate  $\text{NO}$  oxidation reaction over  $\text{Mn}_a\text{WO}_x/\text{TiO}_2$  is obviously higher than that over bulk  $\text{Mn}_a\text{WO}_x$  in the low temperature

range of 50- 200 °C. However, considering XPS analysis in Fig.9 and Table4, surface absorbed  $O_a$  ratio of bulk  $Mn_aWO_x$  is higher than the supported catalysts. The results indicate that some other important changes (such as the existence and increase of  $MnWO_4$  crystallite, and surface acid sites) but not the changes of  $O_a$  ratio induced by the addition of carrier caused the enhancement of low temperature NO oxidation ability. However, the inhibited high temperature oxidation of  $NH_3$  over  $Mn_2WO_x/TiO_2-SHS$  might be also associated with the low  $O_a$  ratio besides the influence of  $MnWO_4$  crystalline phase.

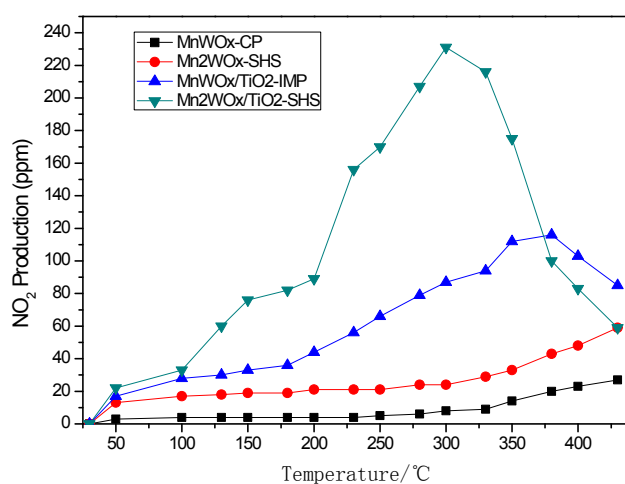

Fig.S5 NO conversions during separate NO oxidation reaction over  $Mn_aWO_x$  and  $Mn_aWO_x/TiO_2$  catalysts. Reaction conditions:  $[NO] = [NH_3] = 500$  ppm,  $[O_2] = 5$  vol.%,  $N_2$  balance and GHSV  $30,000 h^{-1}$ .
